# Supplementary material
Source: publisher figshare collection journal article supplement (https://acs.figshare.com/ndownloader/files/3797584)
Supplement: Supplementary file 1 [file 3797584]

# **Supporting Information for**

## **Electrochemical Properties and Applications of Nanocrystalline, Microcrystalline and Epitaxial Cubic Silicon Carbide Films**

Hao Zhuang, Nianjun Yang, Lei Zhang, Regina Fuchs, Xin Jiang<sup>\*</sup>

*Institute of Materials Engineering, University of Siegen, Paul-Bonatz-Str. 9-11, 57076  
Siegen, Germany*

\* Tel.: +492717402966

E-mail: [xin.jiang@uni-siegen.de](mailto:xin.jiang@uni-siegen.de) (Xin Jiang)

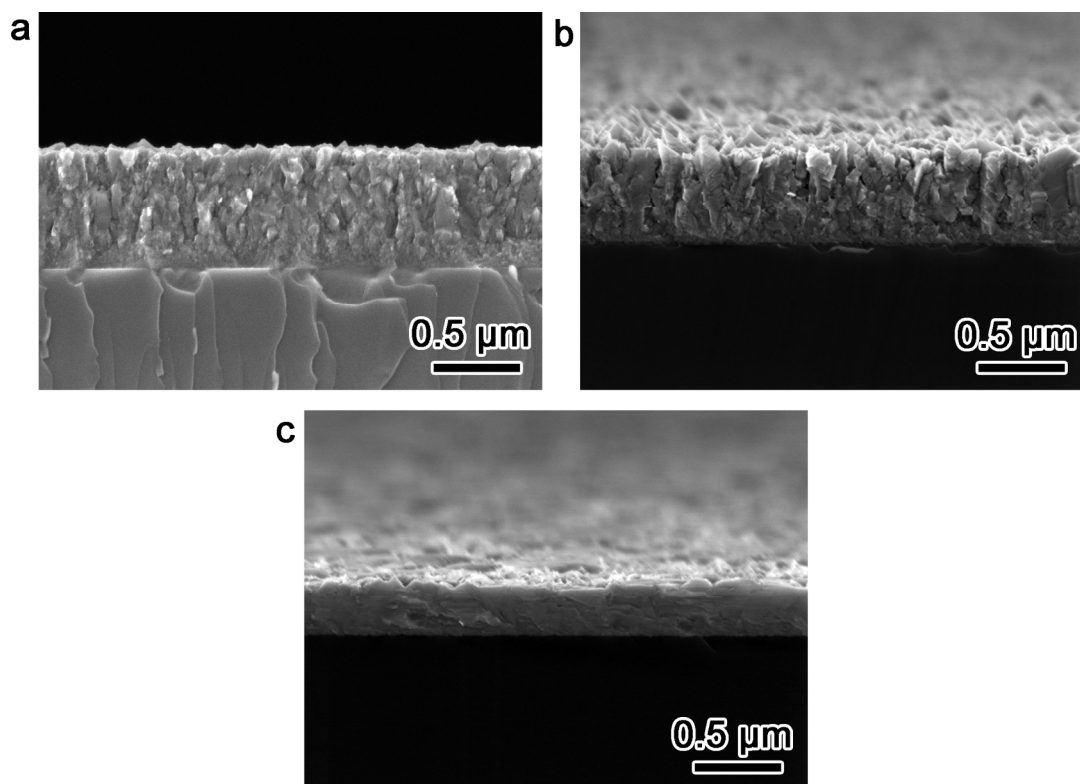

Figure S1. (a) – (c) SEM cross-sectional image of the 3C-SiC films: (a) nanocrystalline; (b) microcrystalline; (c) epitaxial 3C-SiC film.

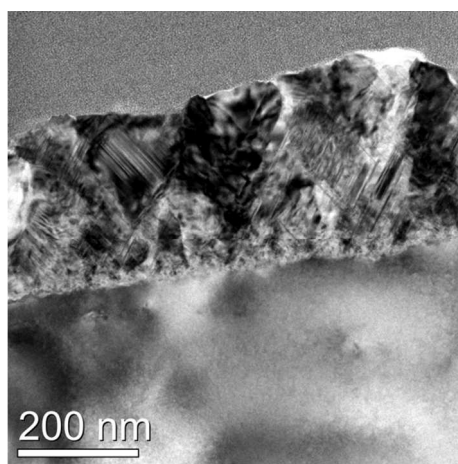

Figure S2. TEM cross-sectional image of the epitaxial 3C-SiC film. No small angle grain boundary is observable indicating the film can be viewed as a single 3C-SiC crystal but with a high density of planar defects.

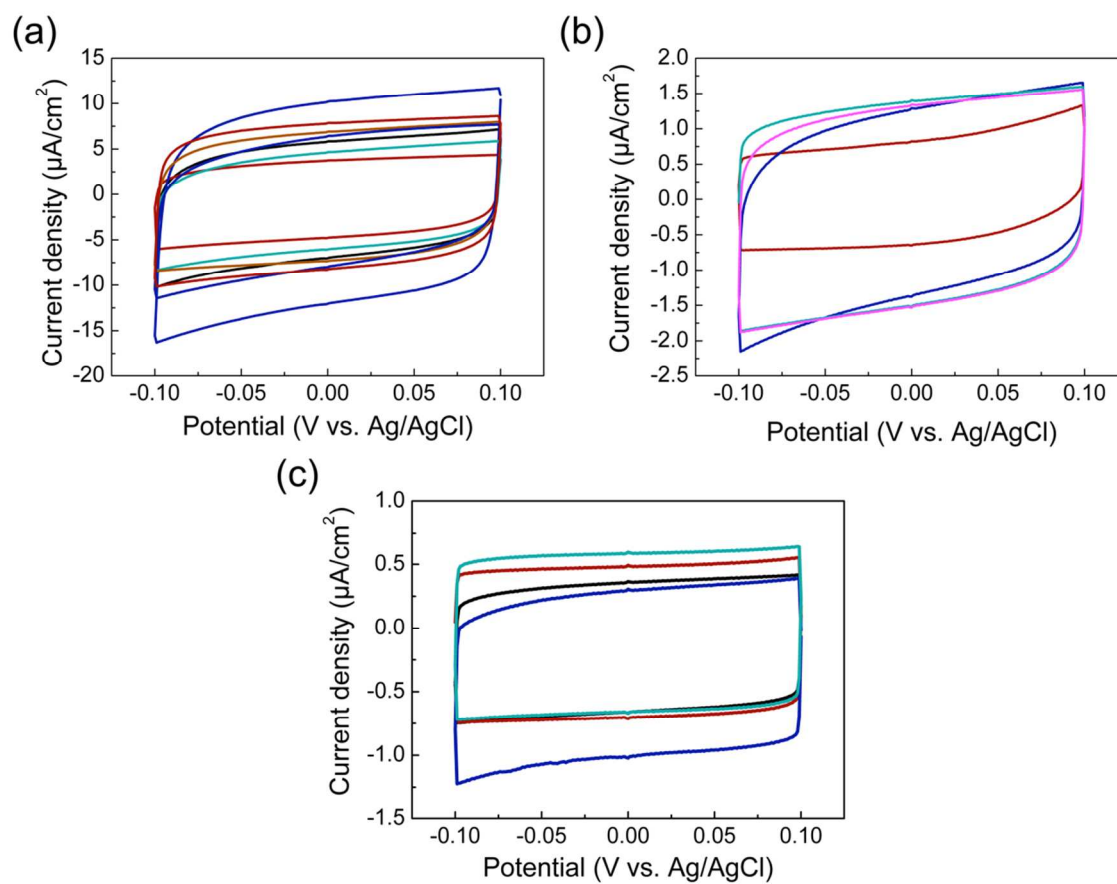

Figure S3. Cyclic voltammetry of 3C-SiC films in 0.1M H<sub>2</sub>SO<sub>4</sub>, scan rate 100 mV/s: (a) different nanocrystalline 3C-SiC films; (b) different microcrystalline 3C-SiC films; (c) different (001)-oriented SiC films.

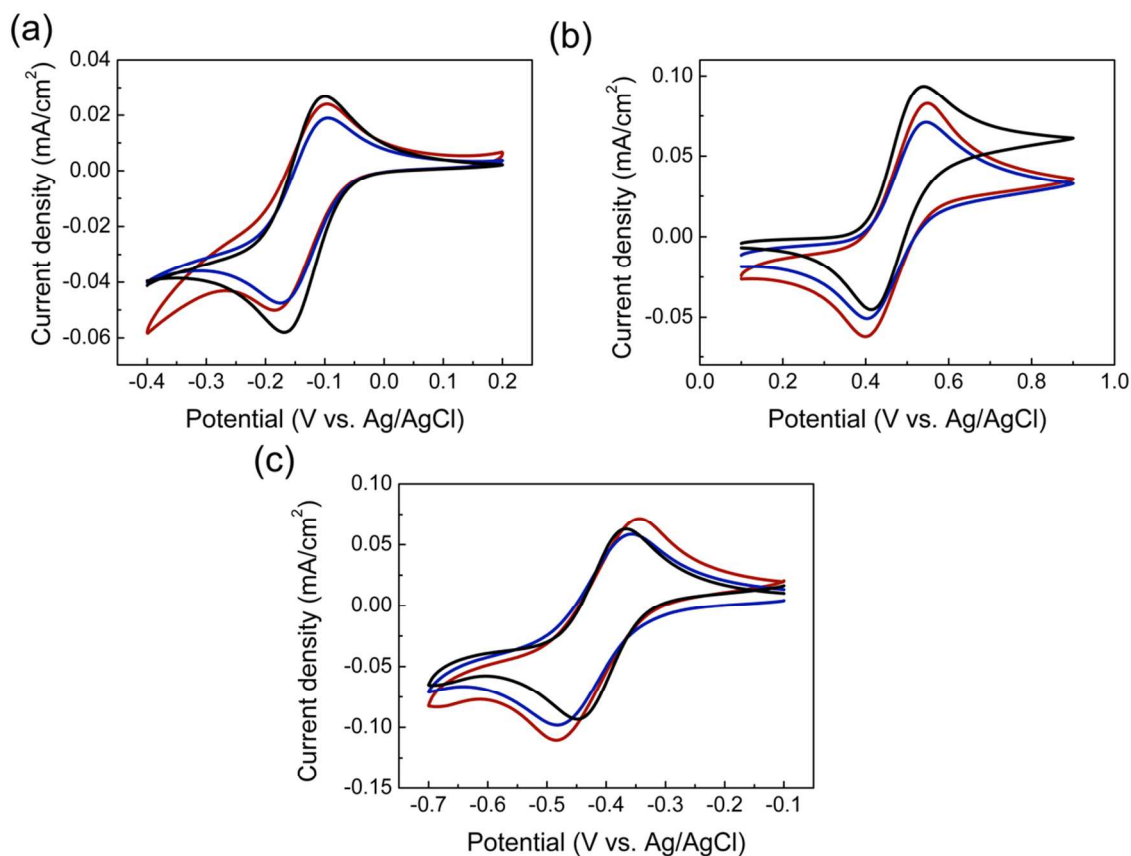

Figure S4. Cyclic voltammetry of 3C-SiC in solutions containing different redox probes: (a) 1 mM [Ru(NH<sub>3</sub>)<sub>6</sub>]<sup>2+/3+</sup> in 0.1 M KCl solution; (b) 1 mM ferrocene in 0.1 M TBABF<sub>4</sub> in acetonitrile; (c) 1 mM quinone in 0.1 M TBABF<sub>4</sub> in acetonitrile. Red: nanocrystalline, blue: microcrystalline, black: epitaxial 3C-SiC film.

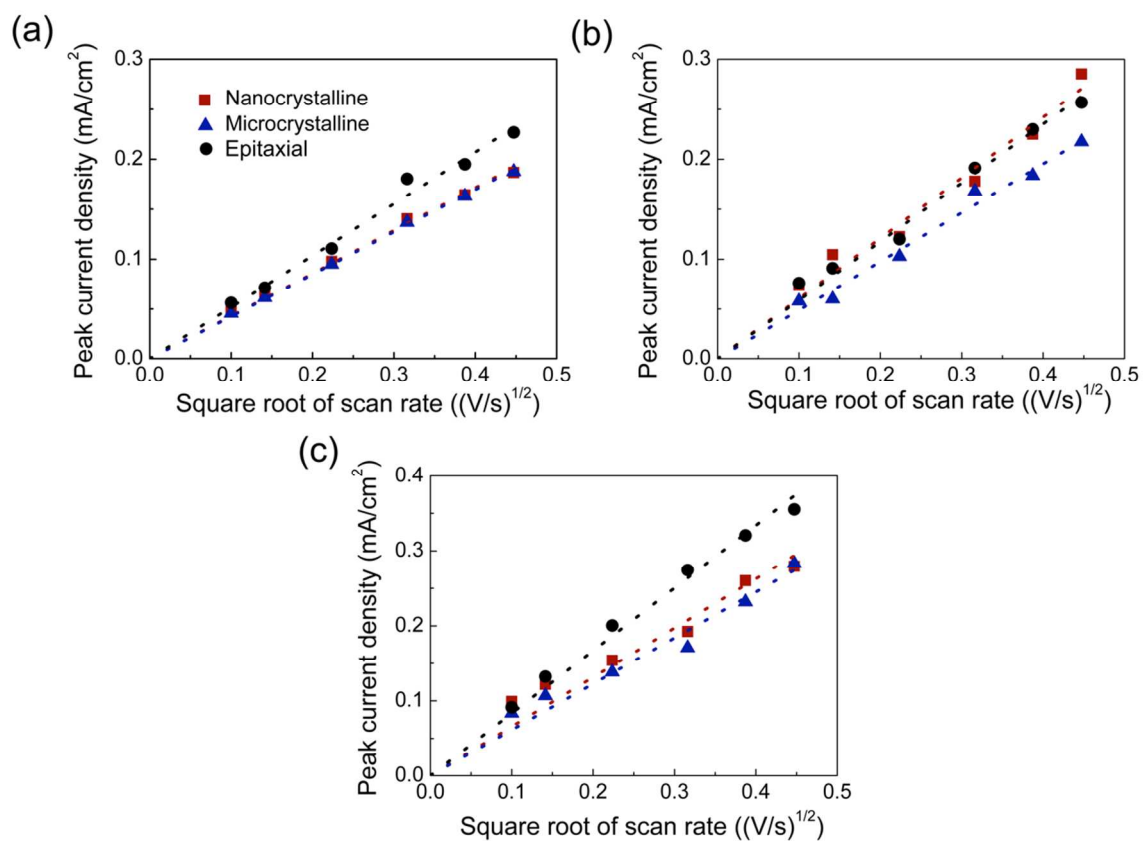

Figure S5. Peak intensity vs. square root of scan rate for different redox probes: (a) 1 mM [Ru(NH<sub>3</sub>)<sub>6</sub>]<sup>2+/3+</sup> in 0.1 M KCl solution; (b) 1 mM ferrocene in 0.1 M TBABF<sub>4</sub> in acetonitrile; (c) 1 mM quinone in 0.1 M TBABF<sub>4</sub> in acetonitrile.

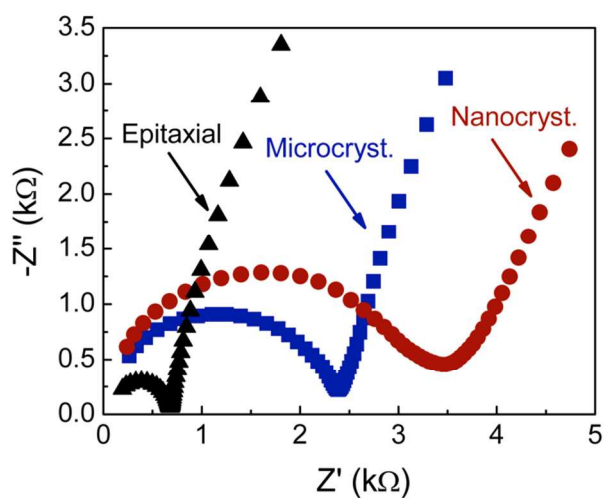

Figure S6. Impedance analysis of the 3C-SiC films in 1mM  $[\text{Fe}(\text{CN})_6]^{3-/4-}$  (0.1M KCl as supporting electrolyte) at the 0.1 V within the frequency range of 100 Hz to 1 MHz and the amplitude of 5 mV. The charge transfer resistance is 3353  $\Omega$  for the nanocrystalline 3C-SiC film, 2394  $\Omega$  for the microcrystalline 3C-SiC film and 581  $\Omega$  for (001)-oriented 3C-SiC film.
